# Supplementary material for: Selectivity Regulation of Au/Titanate by Biochar Modification for Selective Oxidation of Benzyl Alcohol
Source: MDPI journal article supplement (doi:10.3390/catal13050864), 2023-05-10
Supplement: s1 [file s1]

Archive with 1 entries (1 files):
- catalysts-2309199-supplementary.pdf
